# Supplementary material for: Genome-wide discovery of lincRNAs with spatiotemporal expression patterns in the skin of goat during the cashmere growth cycle
Source: PubMed Central journal article supplement (PMC6019838; doi:10.1186/s12864-018-4864-x), 2018-06-26

Figure S3

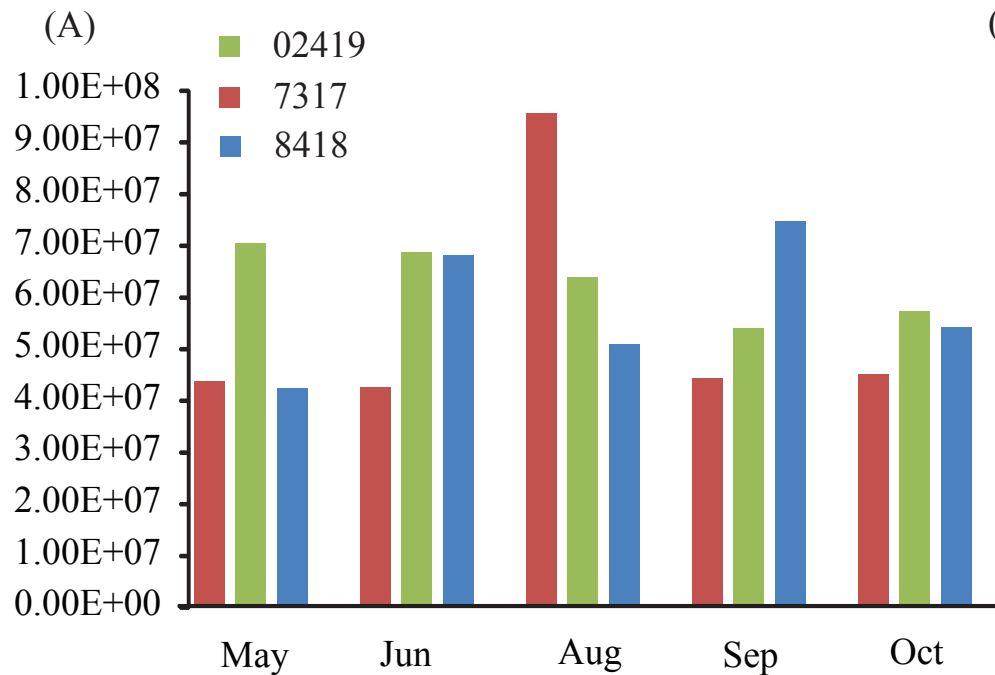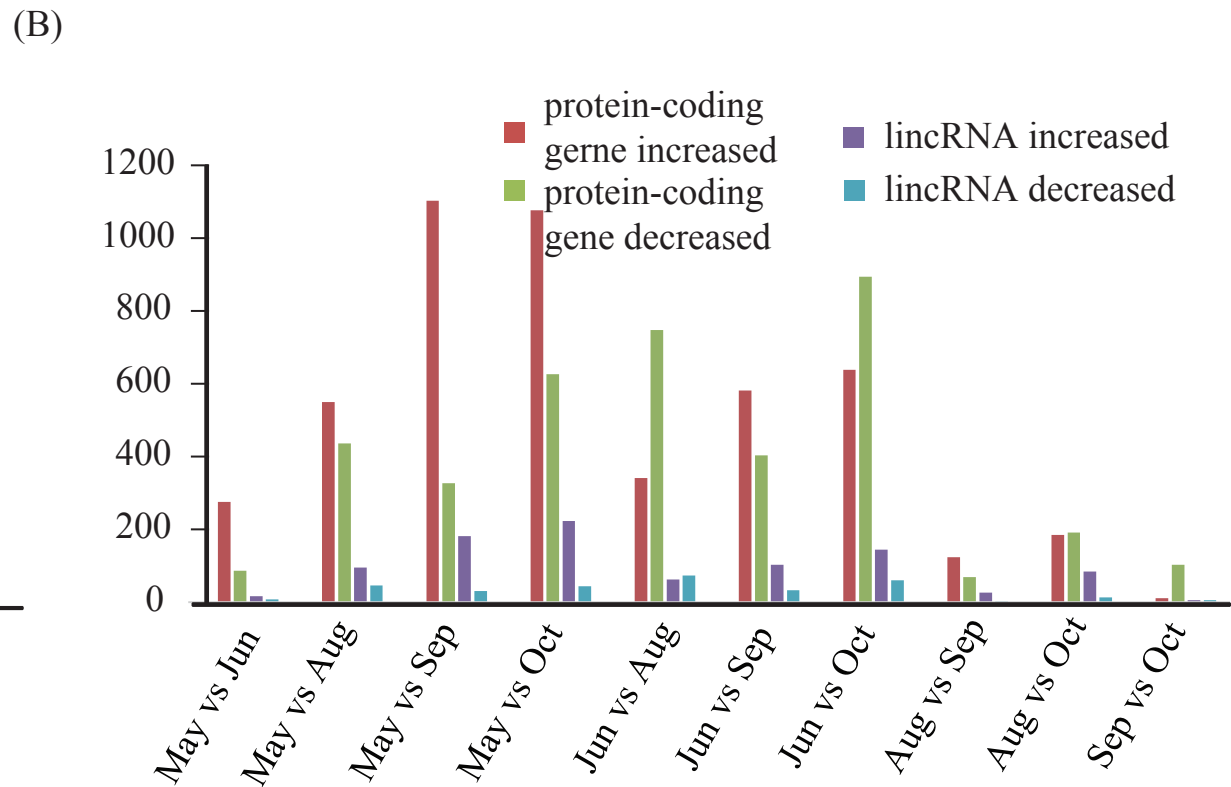

Supplement: 12864_2018_4864_MOESM4_ESM.pdf [file 12864_2018_4864_MOESM4_ESM.pdf]
